# Supplementary material for: High-pressure homogenization of olivine-hosted CO&lt;sub&gt;2&lt;/sub&gt;-rich melt inclusions in a piston cylinder: insight into the volatile content of primary mantle melts
Source: Copernicus journal article supplement (doi:10.5194/ejm-34-325-2022), 2022-05-24
Supplement: Supplementary file 1 [file ejm-34-325-2022-supplement.zip]

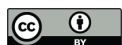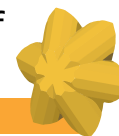

*Supplement of*

**High-pressure homogenization of olivine-hosted CO<sub>2</sub>-rich melt inclusions in a piston cylinder: insight into the volatile content of primary mantle melts**

**Roxane Buso et al.**

*Correspondence to:* Roxane Buso ([roxane.buso@etu.uca.fr](mailto:roxane.buso@etu.uca.fr))

- [ejm-34-325-2022-supplement-title-page.pdf](#)
- [Buso\\_et\\_al\\_Supplementary material](#)
  - [Buso\\_et\\_al\\_Supplementary Table S1.pdf](#)
  - [Buso\\_et\\_al\\_Supplementary Tables S2-S3-S4.xlsx](#)
  - [Buso\\_et\\_al\\_Supplementary material.pdf](#)

The copyright of individual parts of the supplement might differ from the article licence.
