# Supplementary material for: High-pressure homogenization of olivine-hosted CO&lt;sub&gt;2&lt;/sub&gt;-rich melt inclusions in a piston cylinder: insight into the volatile content of primary mantle melts
Source: Copernicus journal article supplement (doi:10.5194/ejm-34-325-2022), 2022-05-24
Supplement: Supplementary file 2 [file ejm-34-325-2022-supplement.zip]

**Table S1.** Synthesis conditions and volatiles composition of basanitic reference glasses.

| Glasses     | Synthesis method | Analytical technique | P<br>GPa | T<br>°C | Time<br>h | Thickness <sup>1</sup><br>cm | ±      | Density <sup>2</sup><br>kg·m <sup>-3</sup> | ±  | FTIR <sup>3</sup>    |       |                                | CHNS <sup>4</sup>    |       |                                | References            |      |                       |
|-------------|------------------|----------------------|----------|---------|-----------|------------------------------|--------|--------------------------------------------|----|----------------------|-------|--------------------------------|----------------------|-------|--------------------------------|-----------------------|------|-----------------------|
|             |                  |                      |          |         |           |                              |        |                                            |    | Water content<br>wt% | ± 1 σ | CO <sub>2</sub> content<br>wt% | Water content<br>wt% | ± 1 σ | CO <sub>2</sub> content<br>wt% |                       |      |                       |
|             |                  |                      |          |         |           |                              |        |                                            |    |                      |       |                                |                      |       |                                |                       |      |                       |
| BSN050417   | GMF              | FTIR                 | 0        | 1300    | 4         | 0.0410                       | 0.0005 | 2841                                       | 37 | 0.023                | 0.001 | 0.00                           |                      |       |                                | Schiavi et al. (2018) |      |                       |
| BSN081117-1 | PC               | FTIR/<br>CHNS        | 1.5      | 1325    | 3         | 0.0054                       | 0.0007 | 2811                                       | 21 | 2.21                 | 0.13  | 0.54                           | 0.02                 | 2.46  | 0.02                           | 0.69                  | 0.05 | Schiavi et al. (2018) |
| BSN081117-2 | PC               | FTIR/<br>CHNS        | 1.5      | 1325    | 3         | 0.0055                       | 0.0007 | 2794                                       | 11 | 2.48                 | 0.10  | 1.76                           | 0.03                 | 2.57  | 0.06                           | 1.76                  | 0.04 | Schiavi et al. (2018) |
| BSN101117-1 | PC               | FTIR/<br>CHNS        | 1.5      | 1325    | 3         | 0.0095                       | 0.0001 | 2793                                       | 43 | 1.92                 | 0.07  | 0.82                           | 0.03                 | 1.87  |                                | 0.85                  | 0.05 | Schiavi et al. (2018) |
| BSN101117-2 | PC               | FTIR/<br>CHNS        | 2.2      | 1325    | 3         | 0.0015                       | 0.0003 | 2790                                       | 48 | 2.86                 | 0.17  | 2.59                           | 0.06                 | 3.06  | 0.06                           | 2.91                  | 0.01 | Schiavi et al. (2018) |
| BSN150121   | PC               | FTIR/<br>CHNS        | 2.5      | 1390    | 3         | 0.0034                       | 0.0002 | 2778                                       |    | 3.02                 |       | 3.94                           |                      | 2.78  |                                | 3.69                  | 0.05 | This study            |
| BSN210121   | PC               | FTIR/<br>CHNS        | 2.5      | 1390    | 3         | 0.0017                       | 0.0002 | 2772                                       |    | 2.89                 |       | 4.44                           |                      | 2.83  |                                | 4.46                  | 0.05 | This study            |

Abbreviations: GMF, gas-mixing furnace; PC, piston cylinder apparatus; P, pressure; T, temperature; t, time; FTIR, Fourier Transform Infrared Spectroscopy; CHNS, Elemental analysis; n.d. not determined.

<sup>1</sup>Thickness of BSN150121 and BSN210121 was determined 1) by counting the interference fringes on the IR spectra collected in reflective mode during the FTIR analysis and 2) by measuring the microscope vertical displacement between the two polished surfaces of the reference glasses when Raman laser is focused on them.

<sup>2</sup>Density of BSN150121 and BSN210121 was calculated by extrapolation of the linear regression defined by the five glasses of Schiavi et al. (2018) (see text). Density of the reference glasses of Schiavi et al. (2018) was measured by Archimedes' method.

<sup>3</sup>Water contents were determined using the molar absorption coefficient for water band at 3500 cm<sup>-1</sup> (57.3 ± 1.8 L·mol<sup>-1</sup>·cm<sup>-1</sup>) provided by Shishkina et al. (2014). CO<sub>2</sub> contents of reference glasses were quantified using the molar absorption coefficients determined in this study (this explains little differences with the values reported in Schiavi et al., 2018). The values given are the average of several measurements, with the exception of BSN150121 and BSN210121.

<sup>4</sup>Water and CO<sub>2</sub> contents are the average of several measurements, with the exception of BSN101117-1, BSN150121 and BSN210121. The error associated with the CO<sub>2</sub> contents given for BSN081117-1, BSN101117-1, BSN150121 and BSN210121 is the largest difference between the CO<sub>2</sub> contents of the glasses obtained for two sessions.
